# Supplementary material for: β-Catenin-Dependent Signaling Pathway Contributes to Renal Fibrosis in Hypertensive Rats
Source: Hindawi journal article supplement (doi:10.1155/2015/726012), 2015-01-01
Supplement: f1 [file 726012.f1.pdf]

Supplementary Figure

**$\beta$ -catenin-dependent signaling pathway contributes to renal fibrosis in hypertensive rats**

Catherina A. Cuevas<sup>1</sup>, Cheril Tapia-Rojas<sup>2</sup>, Carlos Cespedes<sup>1</sup>, Nivaldo C. Inestrosa<sup>2,3</sup> and Carlos P. Vio<sup>1,3</sup>.

<sup>1</sup>Department of Physiology, <sup>2</sup>Department of Cellular and Molecular Biology, Faculty of Biological Sciences, <sup>3</sup>Center for Aging and Regeneration CARE Chile UC, Pontificia Universidad Catolica de Chile, Alameda 340, Santiago, Chile.

Corresponding author :

Carlos P. Vio, M.D.

Department of Physiology

Pontificia Universidad Catolica de Chile

Alameda 340, Santiago, Chile

e-mail: cvio@uc.cl

With the purpose of monitoring the level of systolic blood pressure (SBP) throughout the all experimental period (0-8 weeks) we performed an independent group of 2K1C and sham rats (n= 8 rats per group) and the SBP was measured at 0, 3, 4 and 8 weeks after surgery. A significant increase on SBP was observed from the 3rd week after surgery. ( $p<0.05$ )

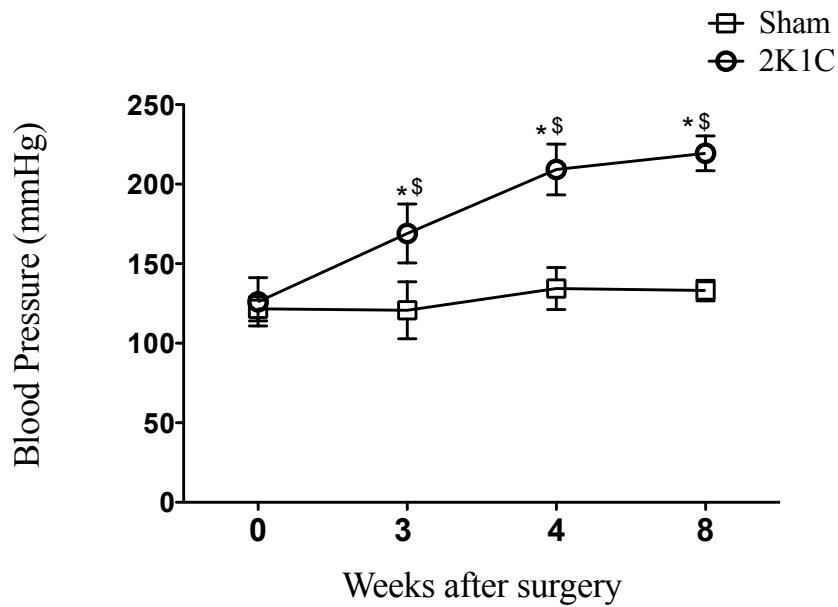

**Supplementary Fig. 1 Time course of SBP in 2K1C rats.** The SBP was measured in sham rats (control) and 2K1C hypertensive rats at 0, 3, 4 and 8 weeks after surgery. A significant increase on SBP was recorded in 3rd week after surgery.  $*P<0.05$
